# Supplementary material for: A conservation palaeobiological approach to assess faunal response of threatened biota under natural and anthropogenic environmental change
Source: Copernicus journal article supplement (doi:10.5194/bg-16-2423-2019), 2019-06-17
Supplement: Supplementary file 3 [file TableS2.xlsx]

## Sheet: SI_TableS3
Species		Minimum salinity (psu)	Maximum salinity (psu)	Optimum salinity in RSL (psu)	Optimum habitat (Venice System classification)	Literature
Mytilaster minimus s.l.	Mytilidae	14	36	18	upper mesohaline	Nicolaidou (2007)
Adacna fragilis	Cardiidae	4	14	8	lower mesohaline	Bogutskaya et al. (2013)
Cerastoderma glaucum	Cardiidae	5	40	18	upper mesohaline	Gittenberger et al. (2004)
Hypanis plicata	Cardiidae	4	8	4	upper oligohaline	Bogutskaya et al. (2013)
Monodacna colorata s.l.	Cardiidae	0.03	4	2	upper oligohaline	Bogutskaya et al. (2013)
Pisidium subtruncatum	Sphaeriidae	0	3	0	fresh water	Gittenberger et al. (2004)
Pisidiumsp.	Sphaeriidae	0	3	0	fresh water	assuming the same as for Pisidium subtruncatum
Corbicula fluminea	Cyrenidae	0	17	0	fresh water	Verbrugge et al. (2012)
Dreissena bugensis	Dreissenidae	0	8	2	upper oligohaline	Orlova et al. (2005)
Dreissena polymorpha	Dreissenidae	0	6	0	fresh water	Gittenberger et al. (2004), Orlova et al. (2005) Verbrugge et al. (2012)
Dreissena sp.	Dreissenidae	0	4.7	0	fresh water	assuming the same as for D. polymorpha
Spisula subtruncata	Mactridae	11?	30?	18	upper mesohaline	Peacock (1993)
Lentidium mediterraneum	Corbulidae	4.6?	38?	18	upper mesohaline	Hallan et al. (2013)
Abra segmentum	Semelidae	5?	36	18	upper mesohaline	Peacock (1993), Funder et al. (2002), Nicolaidou (2007)
Theodoxus danubialis	Neritidae	0	24	0	fresh water	assuming the same as for Theodoxus fluviatilis
Theodoxus fluviatilis	Neritidae	0	24	0	fresh water	Neumann (1959), Graham (1988), Glöer (2002), Zettler et al. (2004)
Theodoxus sp.	Neritidae	0	24	0	fresh water	assuming the same as for Theodoxus fluviatilis
Viviparus acerosus	Viviparidae	0	3	0	fresh water	Gittenberger et al. (2004)
Bittium reticulatum s.l.	Cerithiidae	4.5	18	18	upper mesohaline	Carboni (2010)
Esperiana esperi	Melanopsidae	0	3?	0	fresh water	Glöer (2002)
Microcolpia daudebartii	Melanopsidae	0	?	0	fresh water	Glöer (2002)
Bithynia leachii	Bithyniidae	0	6	0	fresh water	Glöer (2002), Verbrugge et al. (2012)
Bithynia tentaculata	Bithyniidae	0	12	0	fresh water	Verbrugge et al. (2012)
Clathrocaspia knipowitschii	Hydrobiidae	0	5.4	3.5	upper oligohaline	Boeters et al. (2015)
Ecrobia maritima	Hydrobiidae	5	65	18	upper mesohaline	Kevrekidis et al. (1995)
Lithoglyphus naticoides	Lithoglyphidae	0	3	0	fresh water	Gittenberger et al. (2004), Verbrugge (2012)
Potamopyrgus antipodarum	Tateidae	0	26	5	lower mesohaline	Hoy et al. (2012), Jacobsen and Forbes (1997)
Rissoa membranacea	Rissoidae	9	18	18	upper mesohaline	Peacock (1993), Rehfeldt (1968)
Tritia reticulata	Nassariidae	5	25?	18	upper mesohaline	Gittenberger et al. (2004)
Ebala pointeli	Murchisonellidae	16	38	18	upper mesohaline	Wilke & Aartsen (1998)
Valvata macrostoma	Valvatidae	0	2	0	fresh water	Gittenberger et al. (2004)
Valvata piscinalis	Valvatidae	0	5.2	0	fresh water	Glöer (2002), Verbrugge et al. (2012)
Parthenina interstincta	Pyramidellidae	16	40	18	upper mesohaline	Wilke & Aartsen (1998), Maidanou et al. (2017)
Retusa truncatula	Retusidae	15?	30	18	upper mesohaline	Funder (2002)
Acroloxus lacustris	Acroloxidae	0	3	0	fresh water	Gittenberger et al. (2004), Verbrugge et al. (2012)
Radix cf. auricularia	Lymnaeidae	0	6	0	fresh water	Gittenberger et al. (2004), Verbrugge et al. (2012)
Physella acuta	Physidae	0	8	0	fresh water	Gittenberger et al. (2004), Verbrugge et al. (2012)
Ferrissia californica	Planorbidae	0	1	0	fresh water	Verbrugge et al. (2012) [for F. wautieri, a synonym of F. californica]
Gyraulus albus	Planorbidae	0	5.2	0	fresh water	Gittenberger et al. (2004), Verbrugge (2012)
Gyraulus crista	Planorbidae	0	5.2	0	fresh water	Gittenberger et al. (2004)
Gyrauluscf. laevis	Planorbidae	0	5	0	fresh water	Gittenberger et al. (2004)
Gyraulus sp.	Planorbidae	0	5.2?	0	fresh water	assuming the same as for Gyraulus albus/crista
Planorbarius corneus	Planorbidae	0	3	0	fresh water	Gittenberger et al. (2004)
Planorbis planorbis	Planorbidae	0	11	0	fresh water	Verbrugge et al. (2012)
Species group based on origin/evolution
Considered fresh water species
Considered Pontocaspian species
Considered marine species
Salinity ranges
Venice System classification	psu
fresh	0 - 0.49
lower oligohaline	0.5 - 1.49
upper oligohaline	1.5 - 4.9
lower mesohaline	5.0 - 9.9
upper mesohaline	10.0 - 18.0
Literature:
Boeters, H.D., Glöer, P., Georgiev, D. & Dedov, I. (2015) A new species of Caspia Clessin et W. Dybowski, 1887 (Gastropoda: Truncatelloidea: Hydrobiidae) in the Danube of Bulgaria. Folia Malacologica, 23, 177-186.
Bogutskaya, N.G., Kijashko, P.V., Naseka, A.M. & Orlova, M.I. (2013) Opredelitel' ryb i bespozvonochnykh Kaspiyskogo morya. T. 1. Ryby i mollyuski. KMK Scientific Press Ltd., St. Petersburg, Moscow.
Carboni, M. G., Bergamin, L., Di Bella, L., Esu, D., Cerone, E. P., Antonioli, F., & Verrubbi, V. (2010). Palaeoenvironmental reconstruction of late Quaternary foraminifera and molluscs from the ENEA borehole (Versilian plain, Tuscany, Italy). Quaternary Research, 74(2), 265-276.
Funder, S., Demidov, I., & Yelovicheva, Y. (2002). Hydrography and mollusc faunas of the Baltic and the White Sea–North Sea seaway in the Eemian. Palaeogeography, Palaeoclimatology, Palaeoecology, 184(3-4), 275-304.
Gittenberger, E., Janssen, A. W., Kuijper, W. J., Kuiper, J. G. J., Meijer, T., Van der Velde, G., & De Vries, J. N. (2004). De Nederlandse Zoetwatermollusken: Recente en fossiele weekdieren uit zoet en brak water. Gittenberger, E., Janssen, A. W., Kuijper, W. J., Kuiper, J. G. J., Meijer, T., Van der Velde, G., & De Vries, J. N. (2004). De Nederlandse Zoetwatermollusken: Recente en fossiele week…
Glöer, P. (2002) Die Tierwelt Deutschlands, 73. Teil: Die Süßwassergastropoden Nord- und Mitteleuropas. Bestimmungsschlüssel, Lebensweise, Verbreitung. ConchBooks, Hackenheim.
Graham A (1988) Molluscs: prosobranch and pyramidellid gastropods, Synopses of the British Fauna, The Linean Society of London and The Estuarine and Brackish-water. Available from: https://scholar.google.de/scholar?hl=en&amp;as_sdt=0%2C5&amp;q=+Molluscs%3A+prosobranch+and+ pyramidellid+gastropods.+-+Synopses+of+the+British+Fauna&amp;btnG= (October 10, 2018).
Hallan, A., & Willan, R. C. (2010). Two new species of Lentidium (Myida: Corbulidae) from tropical northern Australia: remarkable fresh/fluviatile to brackish-water bivalves. Molluscan Research, 30(3), 143.
Hoy, M., Boese, B. L., Taylor, L., Reusser, D., & Rodriguez, R. (2012). Salinity adaptation of the invasive New Zealand mud snail (Potamopyrgus antipodarum) in the Columbia River estuary (Pacific Northwest, USA): physiological and molecular studies. Aquatic Ecology, 46(2), 249-260.
Jacobsen, R., & Forbes, V. E. (1997). Clonal variation in life‐history traits and feeding rates in the gastropod, Potamopyrgus antipodarum: performance across a salinity gradient. Functional Ecology, 11(2), 260-267.
Kevrekidis, T., Wilke, T. & Mogias, A. (2005) When DNA puts ecological works back on the right track: genetic assessment and distribution patterns of mudsnail populations in the Evros Delta lagoons. Archiv für Hydrobiologie, 162, 19-35.
Maidanou, M., Koulouri, P., Arvanitidis, C., Koutsoubas, D., & Dounas, C. (2017). Macrobenthic assemblage structure associated with a Caulerpa prolifera meadow in the eastern Mediterranean Sea (Elounda Bay, Crete Island). Regional Studies in Marine Science, 14, 1-14.
Neumann D (1959) Morphologische und experimentelle untersuchungen über die variabilität per farbmuster auf der schale von Theodoxus fluviatilis l. Zeitschrift für Morphologie und Ökologie der Tiere 48: 349–411. doi: 10.1007/BF00408578
Nicolaidou, A. (2007). Lack of temporal variability in the benthos of a coastal brackish water lagoon in Greece. Mediterranean Marine Science, (2).
Orlova, M.I., Muirhead, J.R., Antonov, P.I., Shcherbina, G.Kh., Starobogatov, Y.I., Biochino, G.I., Therriault, T.W. & MacIsaac, H.J. (2005) Range expansion of quagga mussels Dreissena rostriformis bugensis in the Volga River and Caspian Sea basin. Aquatic Ecology, 38, 561-573.
Peacock, J. D. (1993). Late Quaternary marine mollusca as palaeoenvironmental proxies: a compilation and assessment of basic numerical data for NE Atlantic species found in shallow water. Quaternary Science Reviews, 12(4), 263-275.
Rehfeldt, N. (1968). Reproductive and morphological variations in the prosobranch ‘Rissoa membranacea’. Ophelia, 5(1), 157-173.
Verbrugge, L.N.H., Schipper, A.M., Huijbregts, M.A.J., Van der Velde, G. & Leuven, R.S.E.W. (2012) Sensitivity of native and non-native mollusc species to changing river water temperature and salinity. Biological Invasions, 14, 1187-1199.
Wilke, T., & Van Aartsen, J. J. (1998). The family Pyramidellidae (Heterostropha, Gastropoda) in the Black Sea. Basteria, 62(1/2), 7-24.
Zettler, M.L., Frankowski, J., Bochert, R. & Rohner, M. (2004) Morphological and ecological features of Theodoxus fluviatilis (Linnaeus, 1758) from Baltic brackish water and German freshwater populations. Journal of Conchology, 38, 305-316.
