# Supplementary material for: A conservation palaeobiological approach to assess faunal response of threatened biota under natural and anthropogenic environmental change
Source: Copernicus journal article supplement (doi:10.5194/bg-16-2423-2019), 2019-06-17
Supplement: Supplementary file 17 [file TableS9.xlsx]

## Sheet: Sheet1
Core	Depth (cm)	Species	Amount of specimens	Weight (in mg, min. 20 mg)
C-03	114	Lentidium mediterraneum	6	40
C-06	120	Ecrobia maritima	16	32
C-07	78	Monodacna sp fragments	8	30
C-07	137	Dreissena polymorpha	1	31
C-10	66	Dreissena polymorpha fragments	6	32
C-13	120	Lithoglyphus naticoides	1	21
C-13	180	Ecrobia maritima	15	30
