# Supplementary material for: A conservation palaeobiological approach to assess faunal response of threatened biota under natural and anthropogenic environmental change
Source: Copernicus journal article supplement (doi:10.5194/bg-16-2423-2019), 2019-06-17
Supplement: Supplementary file [file bg-16-2423-2019-supplement-title-page.pdf › bg-16-2423-2019-supplement-title-page.pdf]

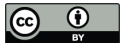

## *Supplement of*

# **A conservation palaeobiological approach to assess faunal response of threatened biota under natural and anthropogenic environmental change**

**Sabrina van de Velde et al.**

*Correspondence to:* Sabrina van de Velde (sabrina.vandavelde@naturalis.nl) and Elisabeth L. Jorissen (e.l.jorissen@uu.nl)

- bg-16-2423-2019-supplement-title-page.pdf
- Supplements
  - TableS1.xlsx
  - TableS2.xlsx
  - TableS3.xlsx
  - TableS4.xlsx
  - TableS5.xlsx
  - TableS6.xlsx
  - TableS7.xlsx
  - TableS8.xlsx
  - TableS9.xlsx

The copyright of individual parts of the supplement might differ from the CC BY 4.0 License.
